1  
2  
3  
4  
5  
6  
7  
8  
9  
10  
11  
12  
13  
14  
15  
16  
17  
18  
19  
20  
21  
22  
23  
24  
25

# **Growth arrest of *Staphylococcus aureus* induces daptomycin tolerance via cell wall remodelling**

Elizabeth V. K. Ledger<sup>1</sup> and Andrew M. Edwards<sup>1\*</sup>

<sup>1</sup> MRC Centre for Molecular Bacteriology and Infection, Imperial College London, Armstrong Rd, London, SW7 2AZ, UK.

\* For correspondence:  
a.edwards@imperial.ac.uk

Keywords: *Staphylococcus aureus* / daptomycin / antibiotic tolerance / peptidoglycan / growth arrest

Running title: Growth arrest induces daptomycin tolerance

26 **Abstract**

27 Almost all bactericidal drugs require bacterial replication and/or metabolic activity for their killing  
28 activity. When these processes are inhibited by bacteriostatic antibiotics, bacterial killing is  
29 significantly reduced. One notable exception is the lipopeptide antibiotic daptomycin, which has been  
30 reported to efficiently kill non-dividing bacteria. However, these studies employed only brief periods  
31 of growth arrest. We found that a bacteriostatic concentration of the protein synthesis inhibitor  
32 tetracycline led to a time-dependent induction of daptomycin tolerance in *S. aureus*, with ~100,000-  
33 fold increase in survival after 16 h growth arrest relative to exponential phase bacteria. Daptomycin  
34 tolerance required glucose and was associated with increased production of the cell wall polymers  
35 peptidoglycan and wall-teichoic acids. However, whilst accumulation of peptidoglycan was required  
36 for daptomycin tolerance, only a low abundance of wall teichoic acid was necessary. Therefore, whilst  
37 tolerance to most antibiotics occurs passively due to a lack of metabolic activity and/or replication,  
38 daptomycin tolerance arises via active cell wall remodelling.

39

40

41

42

43

44

45

46

47

48

49

50

51

52

53

54

55

56

## 57 Introduction

58 All antibiotics disrupt essential processes or structures in bacteria [1,2]. Whether this disruption leads  
59 to bacterial killing or growth inhibition is a function of antibiotic class, as well as the physiological state  
60 of the cell [1,2,3,4,5,6,7,8,9,10,11]. Understanding the factors that modulate antibiotic activity is  
61 important because the inability of bactericidal antibiotics to kill bacteria has been linked to treatment  
62 failure and the emergence of antibiotic resistance [12,13,14,15,16,17]. This is particularly important  
63 in the case of *S. aureus*, since this pathogen causes several refractory infections, including  
64 bacteraemia, infective endocarditis, osteomyelitis and implant infections [12,13,14,18].

65 It is well established that growth arrest of bacteria, for example via exposure to a bacteriostatic  
66 antibiotic, significantly increases bacterial survival during subsequent exposure to most bactericidal  
67 antibiotics [3,8,9,10]. However, the reasons for this are subject to debate because, in addition to  
68 blocking replication, bacteriostatic antibiotics also inhibit bacterial respiration, which in turn  
69 compromises metabolic pathways [10]. Since a lack of metabolic activity results in growth arrest it has  
70 been challenging to determine whether killing by bactericidal antibiotics requires active metabolism  
71 or replication (or both) to occur. However, a recent study provided evidence that metabolic activity is  
72 more important than replication for killing of the human and animal pathogen *Staphylococcus aureus*  
73 by several different antibiotics, and an earlier report linked a lack of cellular ATP in this bacterium to  
74 antibiotic tolerance [8,11]. Since the physiological state of bacteria at infection sites is likely to be  
75 different from that in laboratory medium, understanding the host and bacterial factors that modulate  
76 antibiotic susceptibility may lead to better treatment outcomes [12,13].

77 One of the very few antibiotics reported to efficiently kill growth-arrested *S. aureus* is the lipopeptide  
78 daptomycin, which is used to treat infections caused by drug-resistant Gram-positive pathogens such  
79 as Methicillin Resistant *Staphylococcus aureus* (MRSA) [19,20,21]. Daptomycin targets  
80 phosphatidylglycerol (PG) and lipid II in the membrane, where it forms oligomeric complexes leading  
81 to membrane depolarisation and permeabilization [19,22,23,24]. The binding of daptomycin to lipid II  
82 also disrupts cell wall synthesis, which is further compromised by mis-localisation of enzymes involved  
83 in peptidoglycan synthesis [19,24,25,26].

84 The ability of daptomycin to kill growth-arrested bacteria has been demonstrated using cells pre-  
85 treated with bacteriostatic antibiotics, membrane depolarising agents or cold temperature, or those  
86 in stationary phase, conditions that almost completely block killing by other bactericidal antibiotics  
87 [10,20,21]. However, whilst daptomycin maintains bactericidal activity against non-replicating  
88 bacteria, these and other studies clearly showed that the degree and rate of killing of growth-arrested  
89 bacteria was reduced compared to replicating bacteria [10,20,21,27,28,29].

90 The reason for the reduced susceptibility of non-replicating *S. aureus* to killing by daptomycin is  
91 unknown [11] but may have important clinical implications because the potent activity of this  
92 antibiotic *in vitro* is not always replicated *in vivo*. In a retrospective analysis, >25% patients with  
93 staphylococcal bacteraemia given daptomycin monotherapy died [30], whilst other studies have  
94 reported treatment failure rates of 11-25% [31,32,33], demonstrating that there is a pressing need to  
95 improve daptomycin-based treatment approaches.

96 Therefore, the aims of this work were to determine the degree to which growth arrest confers  
97 daptomycin tolerance, the mechanism responsible and to identify ways to prevent tolerance and  
98 enhance daptomycin treatment efficacy.

99

100

101

102

103

104

105

106

107

108

109

110

111

112

113

114

115

116

## 117 **Results**

### 118 **Antibiotic-mediated growth arrest induces daptomycin tolerance in a time- and nutrient-dependent** 119 **manner**

120 To test whether growth arrest of *S. aureus* led to daptomycin tolerance we grew bacteria to mid-  
121 exponential phase, and then exposed them directly to daptomycin, or incubated cells with a  
122 bacteriostatic concentration of tetracycline for 16 h before exposure to daptomycin. As expected,  
123 exponential phase *S. aureus* was very susceptible to daptomycin, with a ~6 log reduction in CFU counts  
124 after 6 h antibiotic exposure (Fig. 1A). By contrast, growth arrest with tetracycline completely  
125 prevented daptomycin killing (Fig. 1A).

126 Since the 16 h of growth arrest used here was longer than that used in previous studies [10,20,21], we  
127 next examined how the duration of growth inhibition affected daptomycin tolerance. In keeping with  
128 previous work [10,20,21], a short period of growth inhibition (1 or 2 h) reduced daptomycin killing by  
129 ~100-fold relative to growing bacteria (Fig. 1B). Cells that were growth-arrested for 4 h showed a  
130 further reduction in susceptibility to daptomycin, with 4 log higher survival relative to growing *S.*  
131 *aureus* cells, whilst a 16 h incubation in tetracycline again conferred complete protection from  
132 daptomycin-mediated killing (Fig. 1B).

133 Since the induction of daptomycin tolerance was time-dependent, we hypothesised that an active  
134 process was required for the loss of antibiotic susceptibility. Therefore, we investigated the nutritional  
135 requirements for tolerance by arresting growth for 16 h with tetracycline in either tryptic soy broth  
136 (TSB) or Müller-Hinton broth (MHB), media with different nutrient compositions.

137 Whilst 16 h growth arrest in TSB completely blocked killing by daptomycin, this was not the case with  
138 MHB, with >1000-fold reduction in CFU after 6 h exposure to the lipopeptide antibiotic (Fig. 1C). One  
139 of the differences between TSB and MHB is that the former contains glucose (2.5 g L<sup>-1</sup>), and  
140 supplementation of MHB with this sugar demonstrated that it was crucial for the induction of  
141 tolerance (Fig. 1C). To confirm the requirement for nutrients, and to demonstrate daptomycin  
142 tolerance was not simply due to a lack of growth or metabolic activity, we arrested growth via nutrient  
143 limitation by incubating bacteria for 16 h in phosphate-buffered saline (PBS) (Fig. 1D). Nutrient  
144 limitation failed to provide the high level of daptomycin tolerance seen in TSB, with a 3 log reduction  
145 of CFU counts within 2 h of daptomycin exposure (Fig. 1D).

146 Together, these data show that growth arrest leads to very high levels of daptomycin tolerance via a  
147 time- and nutrient-dependent process, in contrast to the tolerance of other bactericidal antibiotics,  
148 which is linked to a lack of metabolic activity [7,9,11].

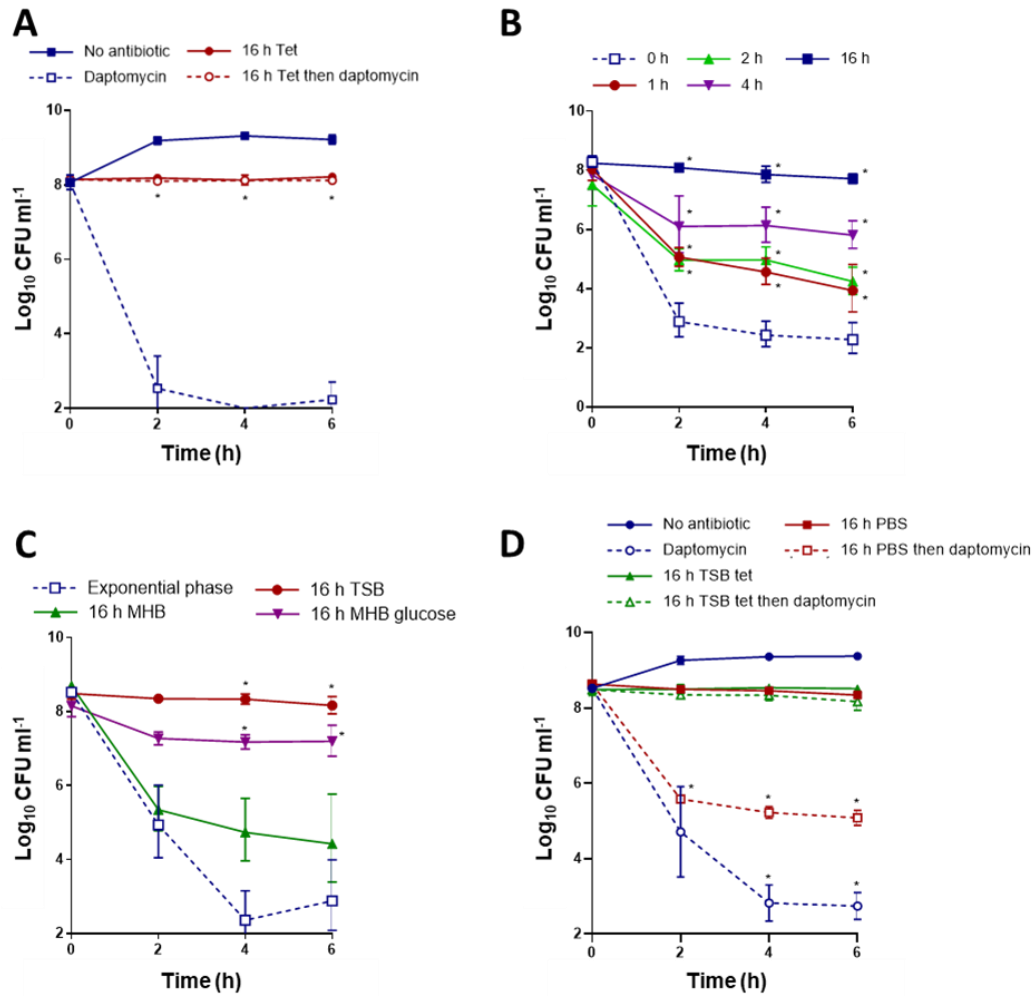

149

150 **Figure 1. Tetracycline-mediated growth arrest induces daptomycin tolerance in a time- and nutrient-**  
 151 **dependent manner.**

152 (A) *S. aureus* USA300 LAC\* was grown to mid-exponential phase, or grown to mid-exponential phase and then  
 153 incubated for 16 h with 1.25  $\mu\text{g ml}^{-1}$  tetracycline, and then  $\log_{10}$  CFU  $\text{ml}^{-1}$  determined throughout a 6 h exposure  
 154 to 20  $\mu\text{g ml}^{-1}$  daptomycin. (B) *S. aureus* USA300 LAC\* was grown to mid-exponential phase and incubated for  
 155 indicated lengths of time with 1.25  $\mu\text{g ml}^{-1}$  tetracycline before  $\log_{10}$  CFU  $\text{ml}^{-1}$  were determined throughout a 6 h  
 156 exposure to 20  $\mu\text{g ml}^{-1}$  daptomycin. (C) *S. aureus* USA300 LAC\* was grown to mid-exponential phase or incubated  
 157 for 16 h with 1.25  $\mu\text{g ml}^{-1}$  tetracycline in TSB, MHB or MHB supplemented with 2.5  $\text{g L}^{-1}$  glucose, before being  
 158 exposed to 20  $\mu\text{g ml}^{-1}$  daptomycin in TSB for 6 h and  $\log_{10}$  CFU  $\text{ml}^{-1}$  determined. (D)  $\log_{10}$  CFU  $\text{ml}^{-1}$  of mid-  
 159 exponential phase cells, or cultures incubated in TSB supplemented with 1.25  $\mu\text{g ml}^{-1}$  tetracycline or in PBS for  
 160 16 h, during a 6 h exposure to 20  $\mu\text{g ml}^{-1}$  daptomycin in TSB. Data represent the geometric mean  $\pm$  geometric  
 161 standard deviation of three independent experiments. Data in A were analysed by two-way ANOVA with Sidak's  
 162 *post-hoc* test (\*  $P < 0.05$ ; daptomycin-treated tetracycline-arrested vs exponential phase). Data in B were  
 163 analysed by two-way ANOVA with Tukey's *post-hoc* test (\*  $P < 0.05$ ; non-arrested vs tetracycline-arrested). Data  
 164 in C were analysed by two-way ANOVA with Dunnett's *post-hoc* test (\*  $P < 0.05$ ; exponential phase vs  
 165 tetracycline-arrested). Data in D were analysed by two-way ANOVA with Dunnett's *post-hoc* test (\*  $P < 0.05$ ;  
 166 tetracycline-arrested vs non-arrested/PBS-arrested. Tet, tetracycline.

167

168

169

## 170 **Daptomycin tolerance requires synthesis of cell surface components**

171 Next, we aimed to determine which biosynthetic pathways were required for daptomycin tolerance  
172 by investigating the effects of growth arrest by various classes of antibiotic. To do this, we incubated  
173 exponential phase cultures of *S. aureus* for 16 h with growth inhibitory concentrations of  
174 chloramphenicol (inhibitor of protein synthesis), ciprofloxacin (inhibitor of DNA replication),  
175 cephalixin (inhibitor of cell wall synthesis), tunicamycin (inhibitor of wall teichoic acid (WTA)  
176 synthesis) or AFN-1252 (inhibitor of fatty acid synthesis), and then challenged with daptomycin.

177 Growth arrest with each of the antibiotics led to varying degrees of daptomycin tolerance (Fig. 2A –  
178 E). Similarly to tetracycline, inhibition of protein synthesis with chloramphenicol led to very high levels  
179 of tolerance, with daptomycin killing less than 1 log of *S. aureus* CFU (Fig. 2A). Growth arrest with  
180 ciprofloxacin also led to a high degree of tolerance (Fig. 2B). However, growth arrest with antibiotics  
181 that inhibited synthesis of components of the cell surface (peptidoglycan, WTA or fatty acids) resulted  
182 in lower levels of daptomycin tolerance (Fig. 2C, D, E). This was especially pronounced with cephalixin  
183 and tunicamycin, where daptomycin caused 2-3 log reductions on CFU within 6 h (Fig. 2C, D).

184 Combined, these data show that growth arrest by different classes of antibiotics resulted in varying  
185 degrees of daptomycin tolerance, but full tolerance required peptidoglycan, WTA and fatty acids,  
186 suggesting that changes to the bacterial cell surface contributed to tolerance.

## 187 **Antibiotic-mediated growth arrest reduces daptomycin binding and membrane damage**

188 To understand how growth arrest-induced changes to the cell wall reduced daptomycin susceptibility,  
189 we next tested whether antibiotic-mediated growth arrest affected the ability of daptomycin to bind  
190 to its membrane target.

191 To do this, we measured attachment of fluorescent BoDipy-daptomycin to mid-exponential phase or  
192 tetracycline-arrested cultures over a 6 h period, with aliquots taken every 2 h to determine the kinetics  
193 of antibiotic binding. In line with the bacterial survival data, exponential phase cells were bound by  
194 high levels of daptomycin within 2 h, whereas growth-arrested cells had significantly reduced levels  
195 of bound daptomycin (Fig. 3A).

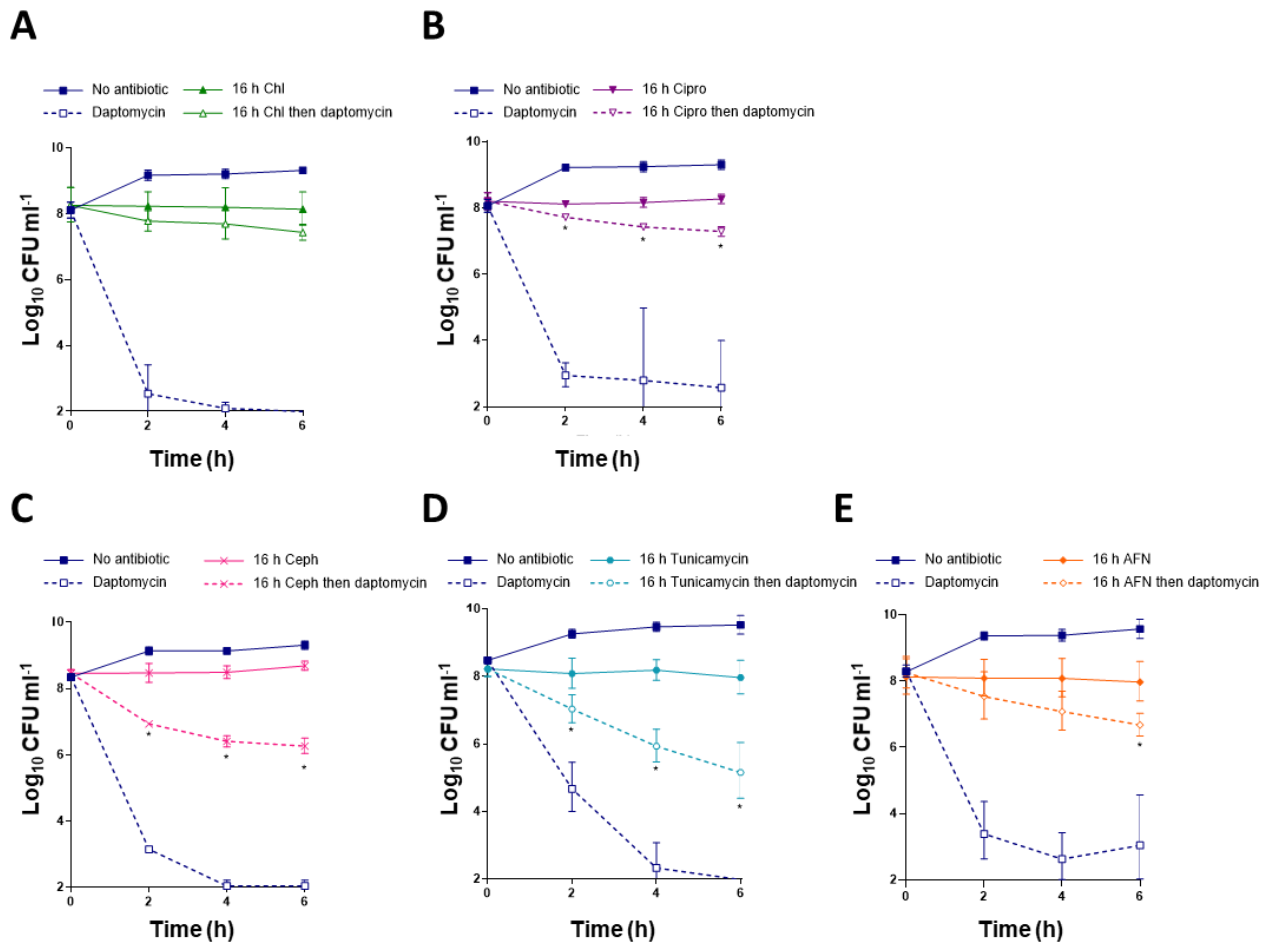

196

197 **Figure 2. Antibiotics with different mechanisms of action induce tolerance to different degrees.**

198 *S. aureus* USA300 LAC\* were grown to mid-exponential phase or incubated for 16 h with (A)  $20 \mu\text{g ml}^{-1}$   
 199 chloramphenicol, (B)  $160 \mu\text{g ml}^{-1}$  ciprofloxacin, (C)  $32 \mu\text{g ml}^{-1}$  cephalixin, (D)  $0.5 \mu\text{g ml}^{-1}$  tunicamycin or (E)  $0.15$   
 200  $\mu\text{g ml}^{-1}$  AFN-1252 before  $\text{log}_{10} \text{CFU ml}^{-1}$  were determined throughout a 6 h exposure to  $20 \mu\text{g ml}^{-1}$  daptomycin.  
 201 Data represent the geometric mean  $\pm$  geometric standard deviation of three independent experiments. Data  
 202 were analysed by two-way ANOVA with Sidak's *post-hoc* test (\*  $P < 0.05$ ; daptomycin-treated antibiotic-arrested  
 203 vs daptomycin-treated exponential phase). Chl, chloramphenicol; Cipro, ciprofloxacin; Ceph, cephalixin; AFN,  
 204 AFN-1252.

205

206 We next measured membrane depolarisation and permeability using the fluorescent dyes DiSC<sub>3</sub>(5)  
 207 and propidium iodide, respectively. As expected from previous work [34], the membranes of  
 208 exponential phase *S. aureus* were rapidly depolarised and permeabilised on exposure to daptomycin  
 209 (Fig. 3B, C). By contrast, no membrane disruption was detected by either assay in the tetracycline-  
 210 arrested cultures (Fig. 3B, C).

211 Finally, we investigated the effect of growth arrest by other classes of antibiotic on daptomycin  
 212 binding. As described above, growth arrest with tetracycline significantly reduced daptomycin binding  
 213 (Fig. 3D). In agreement with the data from bacterial survival assays (Fig. 2A, B, C, D, E),  
 214 chloramphenicol and ciprofloxacin also significantly reduced daptomycin binding compared to



215

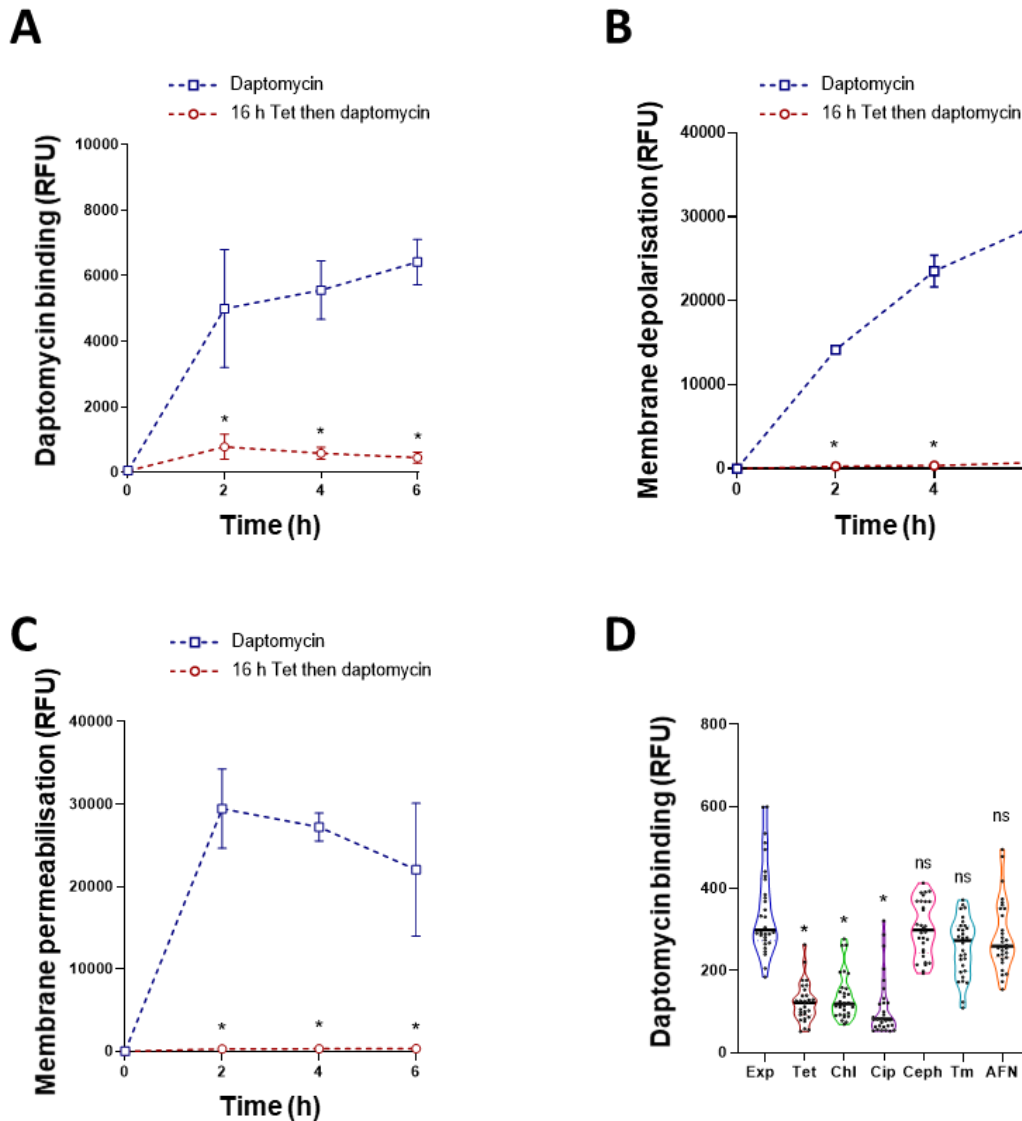

216

217

218 **Figure 3. Antibiotic-mediated growth arrest reduces daptomycin binding and membrane damage.**

219 (A) *S. aureus* USA300 LAC\* were grown to mid-exponential phase or incubated for 16 h with 1.25  $\mu\text{g ml}^{-1}$   
 220 tetracycline before being exposed to 80  $\mu\text{g ml}^{-1}$  BoDipy-daptomycin and cell-associated fluorescence  
 221 determined. (B) DiSC<sub>3</sub>(5) and (C) propidium iodide fluorescence of mid-exponential or tetracycline-arrested  
 222 cultures during a 6 h exposure to 20  $\mu\text{g ml}^{-1}$  daptomycin. (D) BoDipy-daptomycin binding to exponential phase  
 223 and antibiotic-arrested cultures of *S. aureus* USA300 LAC\*. Cultures were incubated with 80  $\mu\text{g ml}^{-1}$  BoDipy-  
 224 daptomycin for indicated lengths of time, washed, fixed and analysed by fluorescence microscopy. The  
 225 fluorescence of 30 cells per condition was measured. Data in A – C represent the mean  $\pm$  standard deviation of  
 226 three independent experiments. Data in D represent individual cellular measurements with the median  
 227 indicated. Data in A – C were analysed by two-way ANOVA with Tukey's *post-hoc* test (\*  $P < 0.05$ ; tetracycline-  
 228 arrested vs exponential phase). Data in D were analysed by Kruskal-Wallis test with Dunn's *post-hoc* test (\*  $P <$   
 229 0.05; Exp vs antibiotic-arrested). Exp, exponential phase; Tet, tetracycline; Chl, chloramphenicol; Cip,  
 230 ciprofloxacin; Ceph, cephalixin; Tm, tunicamycin; AFN, AFN-1252.

231

232 exponential phase cultures, while BoDipy-daptomycin bound as well to cells incubated with  
233 cephalixin, tunicamycin or AFN-1252 as to exponential phase cultures (Fig. 3D).

234 Taken together, these data demonstrate that the daptomycin tolerance of growth-arrested bacteria  
235 is due to reduced binding of the lipopeptide to its membrane targets, likely resulting from changes to  
236 the cell envelope.

### 237 **Daptomycin tolerance requires changes to the cell wall but not the membrane**

238 The next objective was to determine which components of the cell surface were required for  
239 daptomycin tolerance. As changes to both the cell wall and membrane components of *S. aureus* have  
240 previously been associated with reduced daptomycin susceptibility [19,35,36,37,38,39,40,41,42], we  
241 tested each in turn, starting with membrane phospholipid synthesis.

242 The main phospholipid species in the *S. aureus* membrane are phosphatidylglycerol (PG), lysyl-  
243 phosphatidylglycerol (LPG) and cardiolipin (CL) [37,39]. As PG is essential, we investigated whether  
244 synthesis of either LPG (by MprF) or CL (by either Cls1 or Cls2) were required for tolerance using  
245 mutants defective for these proteins from the NARSA library, which was generated in the USA300 LAC  
246 JE2 background. Therefore, we first confirmed that tetracycline induced daptomycin tolerance in the  
247 JE2 WT strain (Fig. 4A), before testing the phenotypes of each of the mutants. Similar to the WT strain,  
248 growth arrest conferred daptomycin tolerance in each of the three phospholipid synthase mutants,  
249 with no significant killing observed in any of the strains (Fig. 4B, C, D).

250 During our assays, we observed that growth-arrested *S. aureus* were much more strongly pigmented  
251 than exponential phase cultures. This pigment, staphyloxanthin, is a major factor influencing  
252 membrane fluidity and has been implicated in reducing daptomycin susceptibility [42]. Therefore, we  
253 next tested a mutant defective in pigment synthesis, *crtM::Tn*. However, despite lacking  
254 staphyloxanthin, this mutant also showed high levels of daptomycin tolerance after being incubated  
255 with tetracycline, confirming that synthesis of this pigment did not contribute to bacterial survival (Fig.  
256 4E). Therefore, we found no evidence that daptomycin tolerance was due to changes in membrane  
257 phospholipid composition or staphyloxanthin content.

258 A major component of the cell envelope are teichoic acids, which can either be covalently bound to  
259 the cell wall (WTA) or anchored to the membrane (lipoteichoic acid, LTA) [43]. These polymers are  
260 both modified with D-alanine groups by the products of the *dltABCD* operon, reducing the net negative  
261 charge of the surface [43]. To test whether either of these polymers were required for tolerance we  
262 examined mutants lacking WTA or LTA ( $\Delta tagO$  or  $\Delta ltaS-S2$ , respectively) or lacking the D-alanine  
263 modification ( $\Delta dltD$ ). These assays showed that survival of each mutant during daptomycin exposure

264 was ~2 log lower than that of the WT after 6 h, indicating that the presence of D-alanylated teichoic  
265 acids was required for full tolerance (Fig. 4F, G, H).

266 To further test whether tolerance required the cell wall, we arrested growth of *S. aureus* with  
267 tetracycline to induce tolerance, then partially digested peptidoglycan with lysostaphin and measured  
268 daptomycin susceptibility. Lysostaphin treatment led to a ~2 log reduction in bacterial survival  
269 compared to cells with an intact cell wall, confirming a key role for the cell wall in mediating  
270 daptomycin tolerance induced by growth arrest (Fig. 4I).

271 Taken together, the induction of daptomycin tolerance in growth-arrested cells was due to changes  
272 to the cell wall but not the membrane.

### 273 **Growth arrest causes peptidoglycan and WTA accumulation**

274 Having established that the cell wall was required for growth-arrest induced daptomycin tolerance,  
275 we next aimed to determine the nature of the changes associated with tolerance.

276 Firstly, we looked at whether growth arrest led to increases in any of the three main components of  
277 the wall, peptidoglycan, WTA and LTA. To test whether peptidoglycan was accumulating, we used  
278 HADA, a fluorescent D-amino acid that is incorporated into peptidoglycan as it is synthesised [44].  
279 Growth arrest was carried out in TSB supplemented with HADA for various lengths of time before  
280 bacteria were imaged and the fluorescence quantified by microscopy. This demonstrated that longer  
281 periods of growth arrest were associated with higher levels of HADA fluorescence, indicating that  
282 peptidoglycan was accumulating over time (Fig. 5A). Next, we extracted and quantified WTA from  
283 exponential phase and growth-arrested cultures, demonstrating a time-dependent increase in the  
284 quantity of WTA, with three times more WTA present after a 16 h growth arrest than in exponential  
285 phase (Fig. 5B). By contrast, extraction and detection of LTA by western blotting revealed no significant  
286 increase in the quantity of LTA in growth-arrested cells compared to those in exponential phase (Fig.  
287 5C).

288 Having identified that growth arrest led to time-dependent increases in both peptidoglycan and WTA,  
289 but not LTA, we next investigated whether the increases in these polymers were nutrient-dependent.  
290 In line with the tolerance data (Fig. 1B), both peptidoglycan and WTA abundance increased when  
291 growth arrest occurred in TSB, whereas no significant accumulation of either polymer was observed  
292 after growth arrest in MHB (Fig. 5D, E). Furthermore, growth arrest in MHB supplemented with  
293 glucose led to increased levels of both peptidoglycan and WTA (Fig. 5D, E). As confirmation that  
294 increased LTA was not associated with growth arrest-induced daptomycin tolerance, we found no  
295 differences

296

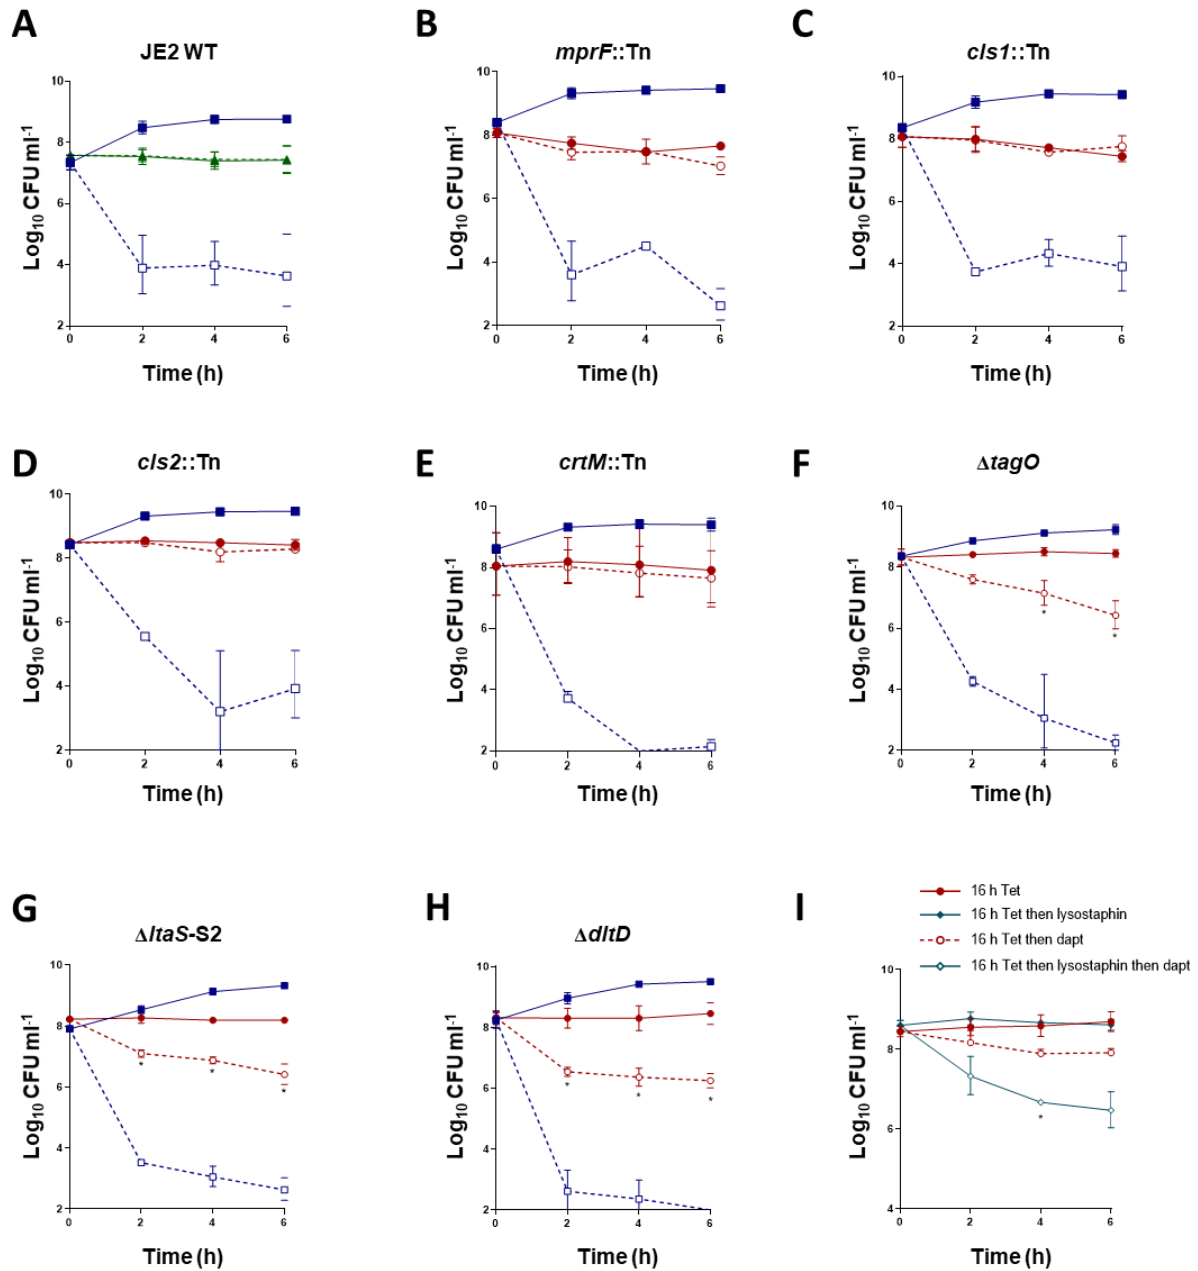

297

298

299

300 **Figure 4. Daptomycin tolerance requires changes in the cell wall and not the cell membrane.**

301  $\text{Log}_{10}$  CFU  $\text{ml}^{-1}$  of exponential phase and tetracycline-arrested cultures of (A) JE2 WT, (B) JE2 *mprF::Tn*, (C) JE2  
 302 *cls1::Tn*, (D) JE2 *cls2::Tn*, (E) JE2 *crtM::Tn*, (F) LAC\*  $\Delta tagO$ , (G) LAC\*  $\Delta ltaS-S2$ , (H) LAC\*  $\Delta dltD$  during a 6 h exposure  
 303 to 20  $\mu\text{g ml}^{-1}$  daptomycin. (I)  $\text{Log}_{10}$  CFU  $\text{ml}^{-1}$  of tetracycline-arrested cultures of *S. aureus* LAC\*, after partial  
 304 digestion of the cell wall with lysostaphin, or not, and during a 6 h exposure to 20  $\mu\text{g ml}^{-1}$  daptomycin. Data in  
 305 represent the geometric mean  $\pm$  geometric standard deviation of three independent experiments. Data in A – H  
 306 were analysed by two-way ANOVA with Sidak's *post-hoc* test (\*  $P < 0.05$ ; tetracycline-arrested vs tetracycline-  
 307 arrested + daptomycin). Data in I were analysed by two-way ANOVA with Dunnett's *post-hoc* test (\*  $P < 0.05$ ;  
 308 lysostaphin treated vs untreated). Tet, tetracycline, Dapt, daptomycin.

309

310 between the levels of LTA in cells arrested in TSB or MHB, and supplementation of MHB with glucose  
311 did not lead to increased LTA (Fig. 5F).

312 Taken together, tetracycline-mediated growth arrest leads to time- and nutrient-dependent increases  
313 in peptidoglycan and WTA, but not LTA.

#### 314 **Daptomycin tolerance is due to the accumulation of peptidoglycan but not WTA**

315 The final objective was to determine whether the accumulation of either peptidoglycan or WTA that  
316 occurred during growth arrest was responsible for tolerance.

317 To do this, we growth-arrested bacteria with tetracycline in TSB in the presence of inhibitors of WTA  
318 synthesis, teichoic acid D-alanylation or peptidoglycan synthesis and then measured daptomycin  
319 tolerance. Firstly, showed that tunicamycin blocked the increase in WTA that occurred during growth  
320 arrest with tetracycline, but maintained levels seen in exponential cells (Fig. 6A). We then measured  
321 the daptomycin susceptibility of the tetracycline plus tunicamycin-arrested bacteria. Despite having  
322 the same levels of WTA as exponential phase bacteria, these cells had very high levels of daptomycin  
323 tolerance, with no significant killing by 6 h. Therefore, the accumulation of WTA that occurs during  
324 growth arrest was not required for daptomycin tolerance (Fig. 6B).

325 Since we'd previously found that cells growth arrested with tunicamycin alone had a low level of  
326 tolerance (Fig. 2D) we examined the levels of WTA in these bacteria. This showed that cells that were  
327 growth arrested with tunicamycin alone had ~5-fold lower levels of WTA relative to exponential-phase  
328 cells (Fig. 6C) or cells growth arrested with tetracycline plus tunicamycin (Fig. 6A). These data, together  
329 with those obtained with the WTA-deficient  $\Delta tagO$  mutant (Fig. 4F), led us to conclude that a minimal  
330 amount of WTA is needed for tolerance, but that accumulation of the polymer above levels seen in  
331 exponential-phase cells was not required.

332 Next, we assessed the importance of D-alanylation of teichoic acids for daptomycin tolerance using  
333 amsacrine, which inhibits DltB [45]. We showed that this inhibitor worked under the conditions used  
334 by measuring the binding of fluorescently labelled poly-L-lysine (FITC-PLL), a positively charged  
335 polymer which is an indicator of bacterial surface charge (Fig. 6D). Exposure of bacteria treated with  
336 tetracycline and amsacrine to daptomycin revealed a very high level of tolerance, demonstrating that  
337 the increased levels of teichoic acid D-alanylation seen in growth arrested cells did not contribute to  
338 antibiotic survival (Fig. 6E), although the presence of some D-alanylation is required (Fig. 4H)

339 Finally, we investigated whether the growth arrest-induced accumulation of peptidoglycan mediated  
340 daptomycin tolerance. Peptidoglycan accumulation was inhibited using fosfomycin, which prevented  
341 the increase in HADA incorporation seen during tetracycline-mediated growth arrest (Fig. 6F). In

342 contrast to tetracycline-arrested cultures, bacteria where peptidoglycan accumulation had been  
343 prevented were significantly killed by daptomycin, with over 2 log reduction in CFU counts after by 6  
344 h exposure to the lipopeptide antibiotic (Fig. 6G).

345 Therefore, while the presence of both WTA and its D-alanine modification are required for daptomycin  
346 tolerance (Fig. 4F, G, H), it is the accumulation of peptidoglycan, and not WTA, which is responsible  
347 for tolerance.

348

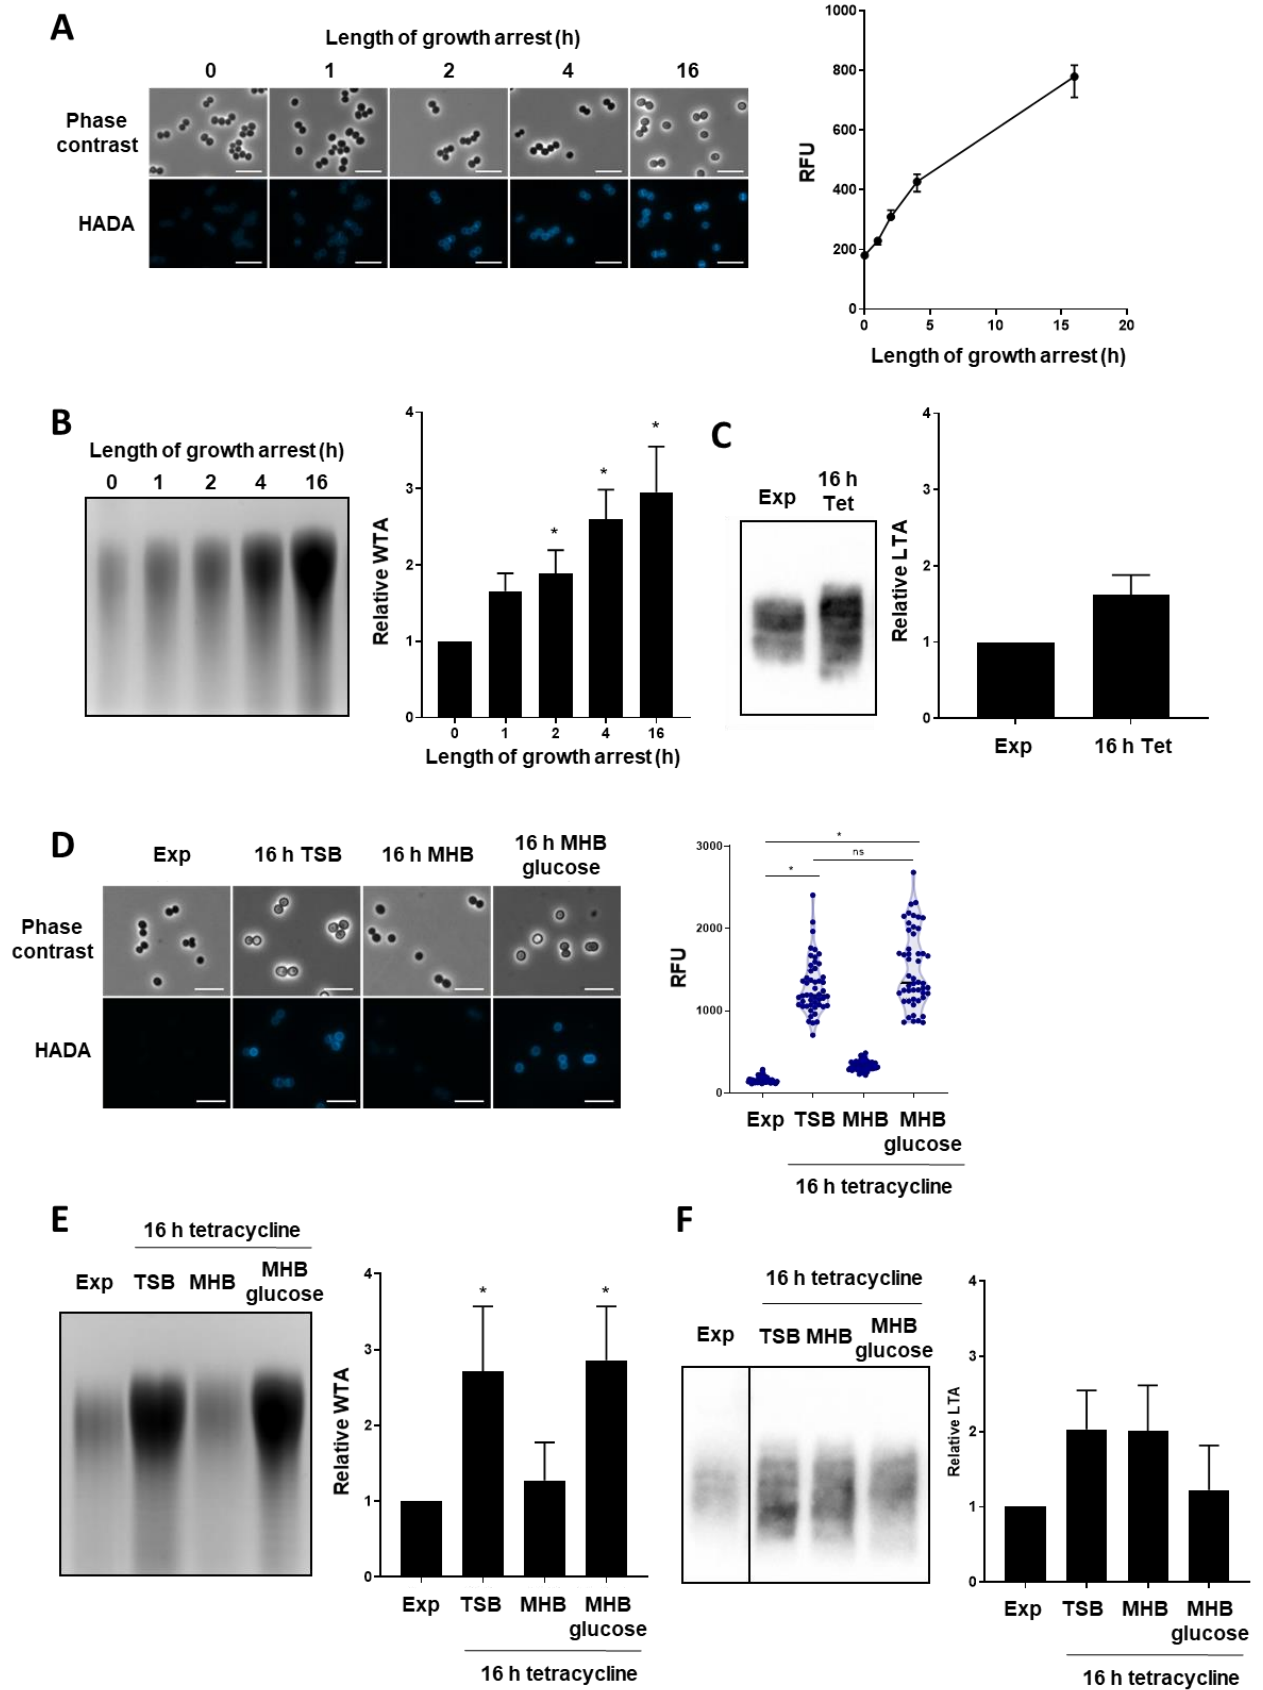

349

350

351 **Figure 5. Growth arrest with tetracycline leads to increases in peptidoglycan and WTA.**  
352 (A) Exponential phase *S. aureus* LAC\* were growth-arrested with tetracycline for indicated lengths of time in the  
353 presence of 25  $\mu$ M HADA before being analysed by phase contrast and fluorescence microscopy and the  
354 fluorescence of the cell surface of individual cells quantified. Exponential phase *S. aureus* LAC\* were growth-  
355 arrested with tetracycline for indicated lengths of time before (B) WTA was extracted, analysed by native PAGE,  
356 visualised with alcian blue and quantified or (C) LTA was analysed by western blotting and quantified. Data are  
357 expressed as relative to exponential phase values. (D) Tetracycline-mediated growth arrest was carried out in  
358 TSB, MHB or MHB supplemented with 2.5 g L<sup>-1</sup> glucose for 16 h in the presence of 25  $\mu$ M HADA before cells were  
359 visualised by phase contrast and fluorescence microscopy and the fluorescence of the surface of individual cells  
360 quantified. Tetracycline-mediated growth arrest was carried out in TSB, MHB or MHB supplemented with 2.5 g  
361 L<sup>-1</sup> glucose for 16 h before (E) WTA was extracted, analysed by PAGE and quantified with alcian blue staining and  
362 (F) LTA was extracted, analysed by western blotting and quantified. Data are expressed as relative to exponential  
363 phase values. Data in B, C, E and F represent the mean  $\pm$  standard deviation of three independent experiments.  
364 Data in A represent the median fluorescence  $\pm$  95 % confidence intervals of 50 individual cells. Data in D  
365 represent the fluorescence values of individual cells with the median indicated. WTA PAGE and LTA western  
366 blots were performed three times and representative images are shown. Data in B were analysed by one-way  
367 ANOVA with Tukey's *post-hoc* test (\* P < 0.05; tetracycline-arrested vs exponential phase). Data in C were  
368 analysed by t-test (no significant difference). Data in D were analysed by Kruskal-Wallis with Dunn's *post-hoc*  
369 test (\* P < 0.05). Data in E and F were analysed by two-way ANOVA with Dunnett's *post-hoc* test (\* P < 0.05;  
370 tetracycline-arrested vs exponential). No significant differences were observed in panel F. Exp, exponential  
371 phase; Tet, tetracycline; TSB, tryptic soy broth; MHB, müller-hinton broth.  
372

373



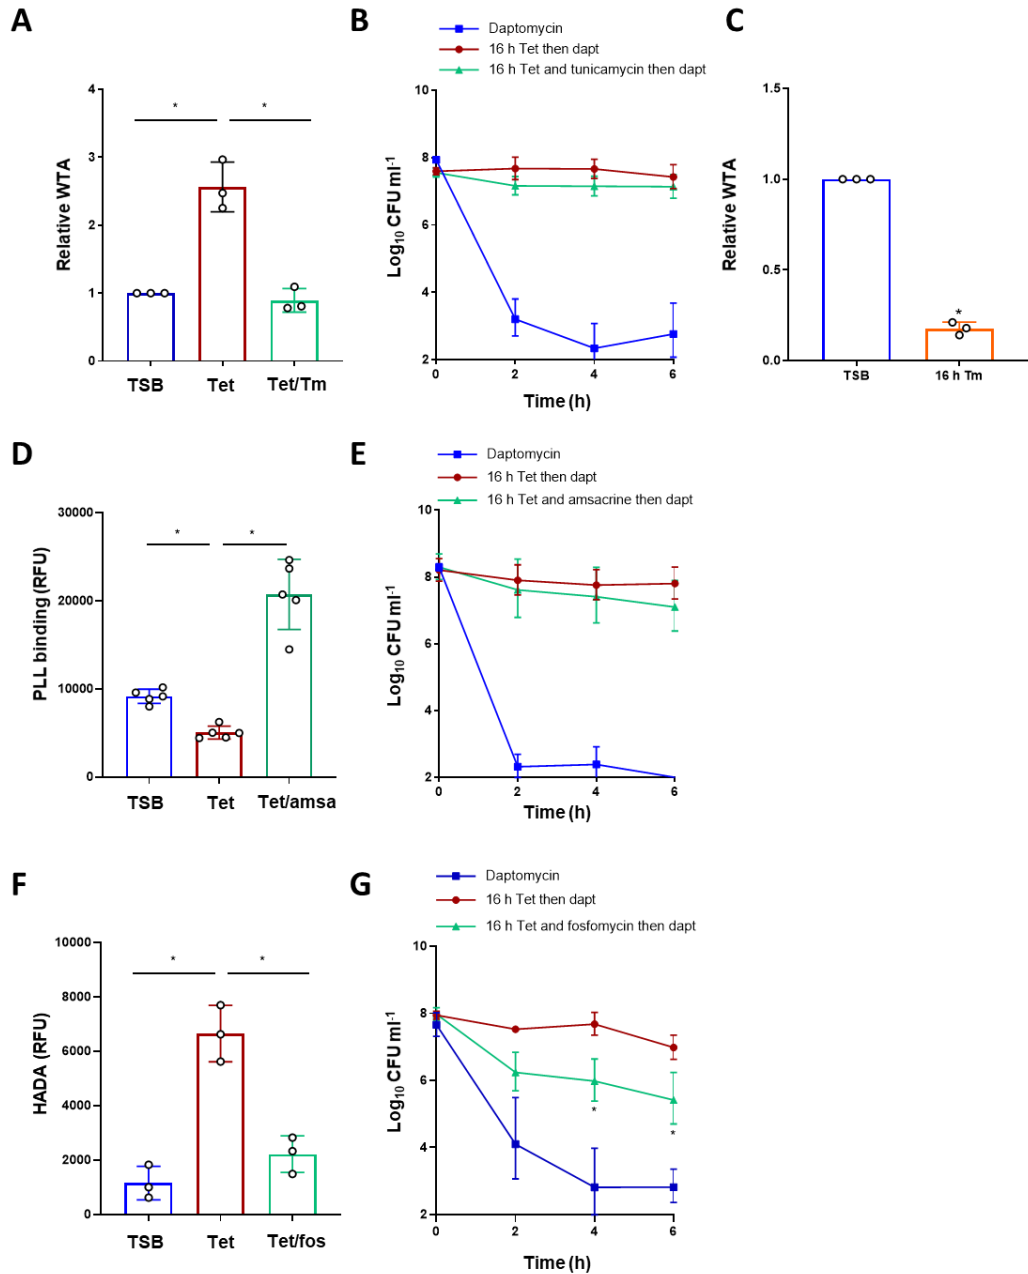

374

375 **Figure 6. Daptomycin tolerance is due to the accumulation of peptidoglycan but not WTA.**

376 Exponential phase *S. aureus* LAC\* were growth-arrested with tetracycline +/- 0.5 µg ml<sup>-1</sup> tunicamycin for 16 h  
 377 before (A) WTA was extracted, analysed by PAGE and quantified by alcian blue staining or (B) log<sub>10</sub> CFU ml<sup>-1</sup>  
 378 determined during a 6 h exposure to 20 µg ml<sup>-1</sup> daptomycin. Exponential phase *S. aureus* were growth-arrested  
 379 with 0.5 µg ml<sup>-1</sup> tunicamycin for 16 h, or not, before WTA was extracted, analysed by PAGE and quantified by  
 380 alcian blue staining (C). Exponential phase *S. aureus* LAC\* were growth-arrested with tetracycline +/- 10 µg ml<sup>-1</sup>  
 381 amsacrine for 16 h before (D) surface charge was measured using FITC-PLL or (E) log<sub>10</sub> CFU ml<sup>-1</sup> determined  
 382 during a 6 h exposure to 20 µg ml<sup>-1</sup> daptomycin. Exponential phase *S. aureus* LAC\* were growth-arrested with  
 383 tetracycline +/- 8 µg ml<sup>-1</sup> fosfomycin for 16 h before (F) peptidoglycan content was measured using HADA or (G)  
 384 log<sub>10</sub> CFU ml<sup>-1</sup> determined during a 6 h exposure to 20 µg ml<sup>-1</sup> daptomycin. Data in A, C, D and F represent the  
 385 mean ± standard deviation of indicated number of independent experiments. Data in B, E and G represent the  
 386 geometric mean ± geometric standard deviation of three independent experiments. Data in A, D and F were  
 387 analysed by one-way ANOVA with Tukey's *post-hoc* test (\* P < 0.05). Data in B, E and G were analysed by two-  
 388 way ANOVA with Dunnett's *post-hoc* test (\* P < 0.05; tetracycline-arrested vs tetracycline + inhibitor-arrested).  
 389 Data in C were analysed by Student's t-test (\* P < 0.05) TSB, tryptic soy broth; Tet, tetracycline; Tm, tunicamycin;  
 390 Amsa, amsacrine; Fos, fosfomycin; Dapt, daptomycin.

## 391 Discussion

392 In contrast to most bactericidal antibiotics, daptomycin has been reported to kill growth-arrested  
393 bacteria, including those exposed to bacteriostatic drugs [10,20,21]. However, previous work has  
394 shown that brief periods of antibiotic-mediated growth arrest reduced daptomycin-mediated killing,  
395 suggesting that the bactericidal activity of the lipopeptide antibiotic is affected by growth status. The  
396 aims of this work were to understand the degree to which growth arrest can reduce killing by  
397 daptomycin and the mechanism responsible.

398 Several studies have shown that antibiotic tolerance arises due to a lack of metabolic activity and/or  
399 replication reducing the deleterious effects of bactericidal antibiotics such as the production of  
400 reactive oxygen species [7,8,9,10,11,15]. By contrast, in this work, we show that growth arrest induces  
401 very high levels of daptomycin tolerance via an active mechanism that requires time, nutrients and  
402 peptidoglycan synthesis.

403 Tetracycline-mediated growth arrest led to an accumulation of major cell wall components, which  
404 agrees with previous work showing that inhibition of protein synthesis halts growth but not  
405 peptidoglycan biosynthesis in *S. aureus* [46]. However, whilst the presence of WTA and D-alanylation  
406 were essential for tolerance, their accumulation was not. This is in keeping with previous work from  
407 our group, that showed that peptidoglycan accumulation in bacteria incubated in serum was  
408 dependent upon the presence, but not accumulation, of D-alanylated WTA [34]. Increased levels of D-  
409 alanylation of teichoic acids and WTA accumulation have been observed in some strains of daptomycin  
410 resistant *S. aureus* (more commonly referred to as daptomycin non-susceptible), although their role  
411 in antibiotic susceptibility was unclear [40,41]. Based on our findings, we hypothesise that D-  
412 alanylated WTA contributes to daptomycin resistance by enabling peptidoglycan accumulation [34].  
413 Whilst this hypothesis would not explain all daptomycin resistance, it is supported by reports  
414 describing increased cell wall thickness in conjunction with increased levels of WTA and D-alanylation  
415 in some daptomycin non-susceptible strains [47,48,49,50,51].

416 We confirmed that peptidoglycan accumulation was required for daptomycin tolerance by partial  
417 digestion of this polymer with lysostaphin. This finding contrasts with a previous study that showed  
418 complete removal of the cell wall led to high levels of daptomycin tolerance in *S. aureus* and *E. faecalis*  
419 [28]. A potential reason for these differing findings is that our work only partially removed the wall  
420 from growth-arrested bacteria in growth media, whereas the previous study completely removed the  
421 wall from growing cells in isotonic buffer (20% sucrose) [28]. Importantly, however, this previous work  
422 also showed that inhibition of peptidoglycan synthesis using fosfomycin increased the anti-bacterial  
423 activity of daptomycin, in agreement with our work [28].

424 Whilst there is clearly a key role for the cell wall in daptomycin tolerance caused by growth arrest,  
425 inhibition of peptidoglycan did not completely restore susceptibility to the levels seen in replicating  
426 cells, indicating that other mechanisms may contribute. For example, membrane fluidity changes as  
427 cells enter stationary phase and this alters daptomycin susceptibility [29]. However, this work  
428 suggested that daptomycin binding to the membrane was unaltered, which contrasts with our  
429 observations here [29]. As such, additional mechanisms by which growth inhibition reduce  
430 daptomycin susceptibility remain to be determined.

431 We have previously found that human serum triggers daptomycin tolerance in *S. aureus* via two  
432 independent mechanisms; increased abundance of peptidoglycan and changes to membrane  
433 phospholipid composition [34]. Although serum restricts staphylococcal growth, a key difference  
434 between daptomycin tolerance induced by growth arrest via antibiotics and that which occurs in  
435 serum is the absence of a role for changes to membrane phospholipid composition mediated by Cls2.  
436 Whilst cardiolipin was required for serum-induced tolerance [34], we found no evidence that  
437 daptomycin tolerance required changes to phospholipid composition. Furthermore, serum-induced  
438 tolerance required the presence of the antimicrobial peptide LL-37 and was not triggered simply via  
439 inhibition of *S. aureus* growth [34]. Taken together, it appears that daptomycin tolerance can arise via  
440 distinct mechanisms in response to various conditions, but in all cases, it appears to require active  
441 remodelling of the cell envelope, rather than a lack of metabolic activity.

442 The reason why some antibiotics kill bacteria and others inhibit growth remains the subject of debate  
443 almost 80 years after penicillin was first used clinically [4,5,6,7]. Whilst there is currently no evidence  
444 to indicate that bactericidal antibiotics lead to better outcomes for patients than bacteriostatic drugs  
445 [52,53,54,55], there is growing evidence that antibiotic tolerance is an underappreciated cause of  
446 treatment failure [13,15,56,57,58]. Antibiotic tolerance has also been shown to be a stepping-stone  
447 to resistance [16,17]. A recent clinical example of this comes from a patient with relapsing MRSA  
448 bacteraemia, which was initially caused by a daptomycin tolerant strain but gave rise to isolates that  
449 were daptomycin non-susceptible during subsequent periods of relapse [59].

450 In addition to the potential clinical implications of antibiotic tolerance, it is anticipated that a better  
451 understanding of how antibiotics work and why certain combinations are synergistic may lead to more  
452 effective treatments. For example, the inhibition of tolerance by fosfomycin or cephalexin suggests  
453 that they may have therapeutic value if used in combination with daptomycin. Indeed, several  
454 previous studies have shown synergy between daptomycin and fosfomycin or  $\beta$ -lactams *in vitro*, and  
455 our group showed that fosfomycin partially inhibited daptomycin tolerance induced by human serum  
456 [34,60,61,62]. There are also promising data from clinical studies, with the presence of a  $\beta$ -lactam or  
457 fosfomycin appearing to promote clearance of *S. aureus* infections [63,64,65]. However, combination

458 therapy was generally more nephrotoxic than daptomycin alone and there was very little evidence to  
459 suggest enhanced patient survival when daptomycin was used with a cell wall-targeting agent  
460 [63,64,65]. Therefore, more work is needed to find the least toxic daptomycin combination therapy  
461 to extract clinical benefit [66].

462 In summary, we have shown that growth arrest results in tolerance to the antibiotic daptomycin, just  
463 as occurs for many other bactericidal antibiotics. However, whilst growth arrest typically confers  
464 antibiotic tolerance passively via reduced metabolic activity, daptomycin tolerance arises via the  
465 active synthesis and accumulation of peptidoglycan.

466

467

## 468 **Methods**

### 469 **Bacterial strains and growth conditions**

470 The bacterial strains used in this study are shown in Table 1. Strains were routinely grown in tryptic  
471 soy broth (TSB; BD Biosciences) for 16 h at 37 °C with shaking (180 rpm) or on tryptic soy agar (TSA;  
472 BD Biosciences). Where appropriate, media were supplemented with 10 µg ml<sup>-1</sup> erythromycin.

### 473 **Generation of mid-exponential phase and growth-arrested cultures**

474 Mid-exponential phase cultures were generated by dilution of overnight cultures to 10<sup>7</sup> CFU ml<sup>-1</sup>, and  
475 then growth for 2 h at 37 °C with shaking (180 rpm) until 10<sup>8</sup> CFU ml<sup>-1</sup> was reached. To generate growth-  
476 arrested cultures, bacteriostatic concentrations of the appropriate antibiotic was added (Table 2). Due  
477 to different susceptibilities of some mutants to some antibiotics, the concentrations used were  
478 optimised for each mutant. Except where stated, growth arrest was performed in TSB for 16 h at 37 °  
479 C with shaking (180 rpm). As bacteriostatic concentrations were used, the CFU ml<sup>-1</sup> remained constant  
480 (10<sup>8</sup> CFU ml<sup>-1</sup>). Where appropriate, growth arrest was performed in phosphate buffered saline (PBS),  
481 cation-adjusted Müller Hinton broth (MHB) or MHB supplemented with 2.5 g L<sup>-1</sup> glucose.

### 482 **Daptomycin killing assays**

483 Mid-exponential phase and growth-arrested cultures (3 ml) were generated as described above. CaCl<sub>2</sub>  
484 was added to a final concentration of 1.25 mM and daptomycin was added to 20 µg ml<sup>-1</sup>. Cultures  
485 were incubated at 37 °C with shaking (180 rpm) for 6 h. At each time point, aliquots were taken, serially  
486 diluted 10-fold in PBS and plated onto TSB to determine CFU ml<sup>-1</sup>. Where appropriate, after growth  
487 arrest cells were incubated with 1 µg ml<sup>-1</sup> lysostaphin in TSB for 1 h at 37 °C to partially remove the cell  
488 wall before addition of daptomycin.

#### 489 **Measurements of daptomycin binding**

490 Daptomycin was labelled with the BoDipy fluorophore as described previously [34]. Cultures (3 ml) of  
491 exponential phase or growth-arrested bacteria were incubated at 37 °C with shaking (180 rpm) with  
492 80 µg ml<sup>-1</sup> BoDipy-daptomycin in TSB supplemented with 1.25 mM CaCl<sub>2</sub>. Every 2 h, aliquots were  
493 taken and washed in PBS three times. Samples (200 µl) were put into black-walled flat-bottomed 96  
494 well plates and fluorescence measured using a TECAN Infinite 200 PRO microplate reader (excitation  
495 490 nm; emission 525 nm). Alternatively, daptomycin binding was investigated by fluorescence  
496 microscopy as described below.

#### 497 **Measurements of membrane depolarisation**

498 Membrane polarity was measuring using 3,3'-dipropylthiadicarbocyanine iodide (DiSC<sub>3</sub>(5);  
499 Thermofisher Scientific), as described previously [34]. This dye binds to polarised membranes,  
500 quenching its fluorescence and resulting in higher fluorescence values correlating with increased  
501 membrane depolarisation. Exponential phase and growth-arrested cultures were exposed to 20 µg ml<sup>-1</sup>  
502 daptomycin for 6 h at 37 °C in 3 ml TSB supplemented with 1.25 mM CaCl<sub>2</sub>. Every 2 h, 200 µl aliquots  
503 were taken into black-walled, flat-bottomed 96-well plates. DiSC<sub>3</sub>(5) was added to a final  
504 concentration of 1 µM, mixed and the plate incubated statically at 37 °C for 5 min. Fluorescence was  
505 measured using a TECAN Infinite 200 PRO microplate reader (excitation 622 nm; emission 670 nm)  
506 and values were divided by OD<sub>600</sub> measurements to normalise for differences in cell density.

#### 507 **Measurements of membrane permeability**

508 Membrane permeability was measured using propidium iodide (PI; Sigma), a membrane-impermeant  
509 dye which fluoresces when bound to DNA, as described previously [34]. Exponential phase and  
510 growth-arrested cultures were exposed to 20 µg ml<sup>-1</sup> daptomycin for 6 h at 37 °C in 3 ml TSB  
511 supplemented with 1.25 mM CaCl<sub>2</sub>. Every 2 h, 200 µl aliquots were washed three times with PBS,  
512 added into a black-walled, flat-bottomed 96-well plate and PI added to a final concentration of 2.5  
513 µM. Fluorescence was measured using a TECAN Infinite 200 PRO microplate reader (excitation 535  
514 nm; emission 617 nm) and values were divided by OD<sub>600</sub> measurements to normalise for differences  
515 in cell density.

#### 516 **Phase contrast and fluorescence microscopy**

517 Exponential phase or growth-arrested cultures were incubated with BoDipy-daptomycin as described  
518 above. After 2 h, aliquots were taken, washed three times in PBS and fixed in 4 % paraformaldehyde.  
519 To measure peptidoglycan synthesis, exponential phase and growth-arrested cultures were generated

520 with the addition of 25  $\mu\text{M}$  HADA. Samples were washed three times in PBS and fixed in 4 %  
521 paraformaldehyde.

522 Aliquots of fixed bacteria (2  $\mu\text{l}$ ) were spotted onto agarose (1.2 % in water) on microscope slides and  
523 covered with a cover slip. Images were taken with a Zeiss Axio Imager.A1 microscope coupled to an  
524 AxioCam MRm and a 100x objective. BoDipy-daptomycin was detected using a green fluorescent  
525 protein filter set and HADA using a DAPI filter set. Images were processed using the Zen 2012 software  
526 (blue edition). Within an experiment, microscopy of all samples was performed at the same time using  
527 identical settings to enable comparisons to be made between samples.

#### 528 **Extraction and quantification of WTA**

529 WTA was extracted from 40 ml cultures of exponential phase or growth-arrested cultures as described  
530 previously [34]. Briefly, cultures were washed with 50 mM MES, pH 6.5, and incubated at 100 °C for 1  
531 h in 4 % SDS, 50 mM MES, pH 6.5. Samples were then washed twice in 4 % SDS, 50 mM MES, once  
532 with 2 % NaCl, 50 mM MES and once with 50 mM MES before being resuspended in 1 ml 20 mM Tris-  
533 HCl pH 8, 0.5 % SDS, 20  $\mu\text{g ml}^{-1}$  proteinase K and incubated for 4 h at 50 °C (shaking at 1400 rpm). The  
534 pellet was recovered, washed with 2 % NaCl, 50 mM MES and three times with water before being  
535 resuspended in 1 ml 0.1 M NaOH and incubated at 20 °C for 16 h (shaking at 1400 rpm). After  
536 centrifugation at 16,000  $\times g$  for 1 min, the supernatant was neutralised with 250  $\mu\text{l}$  1 M Tris-HCl, pH  
537 7.8 and stored at -20 °C.

538 Purified WTA was loaded on 20 % native polyacrylamide gels and run at 120 V in Tris-Tricine running  
539 buffer (0.1 M Tris, 0.1 M Tricine) before being stained with 0.1 % alcian blue in 3 % acetic acid. Gels  
540 were destained with water and imaged using a Gel Doc EZ Imager (Bio-Rad). WTA intensity was  
541 quantified using ImageJ.

#### 542 **Extraction, detection and quantification of LTA**

543 Exponential phase and growth-arrested cultures (10 ml) were resuspended in 1 ml PBS and transferred  
544 to screw cap tube containing approximately 100  $\mu\text{l}$  0.1 mm glass beads. Cells were lysed at room  
545 temperature using a FastPrep-24 (MP Biomedicals) machine (4 cycles of 6.5 m/s for 40 s followed by  
546 a 1 min rest). Tubes were centrifuged at 200  $\times g$  for 1 min to settle the beads and 500  $\mu\text{l}$  supernatant  
547 removed into a new tube. Centrifugation (16,000  $\times g$  for 15 min) pelleted the cellular debris including  
548 the LTA. The supernatant was discarded and the pellet resuspended in 100  $\mu\text{l}$  2x Laemmli sample  
549 buffer (4 % SDS, 20 % glycerol, 10 %  $\beta$ -mercaptoethanol, 0.02 % bromophenol blue, 0.125 M Tris-HCl,  
550 pH 6.8). Samples were incubated at 95 °C for 20 min, then centrifuged at 17,000  $\times g$  for 5 min before  
551 the supernatant, containing LTA, was moved to a fresh Eppendorf and stored at -20 °C.

552 LTA extracts (10  $\mu$ l) were run on 15 % polyacrylamide gels and transferred to PVDF membranes using  
553 a Trans-Blot Turbo transfer system (Bio-Rad). After blocking with 5 % milk and 1 % BSA in TBST, LTA  
554 was detected with an anti-LTA primary antibody (mAb 55; HycultBiotech; 1:5000 dilution) and an HRP-  
555 goat anti-mouse IgG secondary antibody (Abcam; 1:10000 dilution). LTA was visualised using  
556 Amersham ECL Prime western blotting detection reagent (GE Healthcare) and a ChemiDoc imaging  
557 system (Bio-Rad). LTA intensity was quantified using ImageJ.

#### 558 **Measurement of surface charge**

559 Bacterial surface charge was determined using fluorescein isothiocyanate-labelled poly-L-lysine (FITC-  
560 PLL). Aliquots (1 ml) of exponential phase and growth-arrested cultures were incubated with 80  $\mu$ g ml<sup>-1</sup>  
561 FITC-PLL for 10 min at room temperature in the dark before being washed three times in PBS. 200  $\mu$ l  
562 was then moved to a black-walled 96 well plate and fluorescence measured using a TECAN Infinite  
563 PRO 200 plate reader (excitation 485 nm; emission 525 nm).

#### 564 **Measurements of peptidoglycan incorporation by plate reader**

565 Peptidoglycan synthesis was measured using HCC-amino-D-alanine (HADA), a fluorescent D-amino  
566 acid analogue. Exponential phase and growth-arrested cultures were generated with the addition of  
567 25  $\mu$ M HADA. Samples were washed three times in PBS and 200  $\mu$ l aliquots moved to black-walled 96  
568 well plates. Fluorescence was measured using a TECAN Infinite 200 PRO microplate reader (excitation  
569 405 nm; emission 450 nm).

#### 570 **Statistical analyses**

571 CFU data were log<sub>10</sub> transformed. Data were analysed by Student's *t*-test, one-way ANOVA or two-  
572 way ANOVA with a *post-hoc* test to correct for multiple comparisons as described in the figure legends  
573 using GraphPad Prism (v8.0).

574

575

576

577

578

579

580

581

582

583 **Table 1. Strains used in this study.**

584

| Strain                         | Characteristics                                                                                    | Reference |
|--------------------------------|----------------------------------------------------------------------------------------------------|-----------|
| USA300 LAC*                    | LAC strain of the USA300 CA-MRSA lineage, cured of LAC-p03 plasmid                                 | 67        |
| USA300 LAC* $\Delta tagO$      | USA300 LAC* with the <i>tagO</i> gene deleted                                                      | 68        |
| USA300 LAC* $\Delta ltaS$ -S2  | USA300 LAC* $\Delta ltaS::erm$ suppressor S2, Ery <sup>r</sup>                                     | 69        |
| USA300 LAC* $\Delta dltD$      | USA300 LAC* with the <i>dltD</i> gene deleted, Ery <sup>r</sup>                                    | 34        |
| USA300 LAC JE2                 | LAC strain of the USA300 CA-MRSA lineage cured of plasmids                                         | 70        |
| USA300 LAC JE2 <i>mprF::Tn</i> | USA300 LAC JE2 with a <i>bursa aurealis</i> transposon insertion in <i>mprF</i> , Ery <sup>r</sup> | 70        |
| USA300 LAC JE2 <i>cls1::Tn</i> | USA300 LAC JE2 with a <i>bursa aurealis</i> transposon insertion in <i>cls1</i> , Ery <sup>r</sup> | 70        |
| USA300 LAC JE2 <i>cls2::Tn</i> | USA300 LAC JE2 with a <i>bursa aurealis</i> transposon insertion in <i>cls2</i> , Ery <sup>r</sup> | 70        |
| USA300 LAC JE2 <i>crtM::Tn</i> | USA300 LAC JE2 with a <i>bursa aurealis</i> transposon insertion in <i>crtM</i> , Ery <sup>r</sup> | 70        |

585 Ery, erythromycin.

586

587 **Table 2. Concentrations of antibiotics used in this study.**

| Antibiotic         | Supplier                | Strain                 | Concentration ( $\mu\text{g ml}^{-1}$ ) |
|--------------------|-------------------------|------------------------|-----------------------------------------|
| Tetracycline (TSB) | Sigma                   | LAC* WT                | 1.25                                    |
|                    |                         | LAC* $\Delta tagO$     | 0.156                                   |
|                    |                         | LAC* $\Delta ltaS$ -S2 | 0.078                                   |
|                    |                         | LAC* $\Delta dltD$     | 0.3125                                  |
|                    |                         | JE2 WT                 | 0.625                                   |
|                    |                         | JE2 <i>mprF::Tn</i>    | 0.625                                   |
|                    |                         | JE2 <i>cls1::Tn</i>    | 0.625                                   |
|                    |                         | JE2 <i>cls2::Tn</i>    | 0.625                                   |
| Tetracycline (MHB) | Sigma                   | LAC* WT                | 5                                       |
| Chloramphenicol    | Sigma                   | LAC* WT                | 20                                      |
| Ciprofloxacin      | Sigma                   | LAC* WT                | 160                                     |
| Cephalexin         | Tokyo Chemical Industry | LAC* WT                | 32                                      |
| Tunicamycin        | Abcam                   | LAC* WT                | 0.5                                     |
| AFN-1252           | MedChemExpress          | LAC* WT                | 0.15                                    |
| Fosfomycin         | Tokyo Chemical Industry | LAC* WT                | 8                                       |
| Amsacrine          | Sigma                   | LAC* WT                | 10                                      |
| Lysostaphin        | Sigma                   | LAC* WT                | 1                                       |

588 TSB, tryptic soy broth; MHB, Müller Hinton broth.

589



## 590 Acknowledgements

591 Angelika Grundling (Imperial College London) thanked for providing strains. Simon Foster (University  
592 of Sheffield) is thanked for providing HADA. Vladimir Pelicic (Imperial College London) is thanked for  
593 providing access to microscopy equipment. All authors acknowledge the provision of strains by the  
594 Network on Antimicrobial Resistance in *Staphylococcus aureus* (NARSA) Program: under NIAID/ NIH  
595 Contract No. HHSN272200700055C. The funders had no role in the study design, interpretation of the  
596 findings or the writing of the manuscript.

## 597 Funding

598 EVKL was supported by a Wellcome Trust PhD Studentship (203812/Z/16/Z). EVKL and AME  
599 acknowledge support from the Rosetrees Trust and from the Imperial NIHR Biomedical Research  
600 Centre, Imperial College London.

## 601 Conflict of interest statement

602 The authors declare no conflict of interest.

## 603 Contributions

604 EVKL conducted experiments. AME and EVKL designed experiments, analysed data and wrote the  
605 manuscript.

606

## 607 References

- 608 1. **Hutchings MI, Truman AW, Wilkinson B.** Antibiotics: past, present and future. *Curr Opin Microbiol.*  
609 2019 51:72-80.  
610
- 611 2. **Blair JM, Webber MA, Baylay AJ, Ogbolu DO, Piddock LJ.** Molecular mechanisms of antibiotic  
612 resistance. *Nat Rev Microbiol.* 2015 13(1):42-51.  
613
- 614 3. **Ocampo PS, Lázár V, Papp B, Arnoldini M, Abel zur Wiesch P, Busa-Fekete R, Fekete G, Pál C,  
615 Ackermann M, Bonhoeffer S.** Antagonism between bacteriostatic and bactericidal antibiotics is  
616 prevalent. *Antimicrob Agents Chemother.* 2014 58(8):4573-82.  
617
- 618 4. **Kohanski MA, Dwyer DJ, Hayete B, Lawrence CA, Collins JJ.** A common mechanism of cellular death  
619 induced by bactericidal antibiotics. *Cell.* 2007 130(5):797-810.  
620
- 621 5. **Keren I, Wu Y, Inocencio J, Mulcahy LR, Lewis K.** Killing by bactericidal antibiotics does not depend  
622 on reactive oxygen species. *Science.* 2013 339(6124):1213-6.  
623
- 624 6. **Liu Y, Imlay JA.** Cell death from antibiotics without the involvement of reactive oxygen species.  
625 *Science.* 2013 339(6124):1210-3.

626

627 **7. Stokes JM, Lopatkin AJ, Lobritz MA, Collins JJ.** Bacterial Metabolism and Antibiotic Efficacy. *Cell*  
628 *Metab.* 2019 30(2):251-259.

629

630 **8. Lopatkin AJ, Stokes JM, Zheng EJ, Yang JH, Takahashi MK, You L, Collins JJ.** Bacterial metabolic state  
631 more accurately predicts antibiotic lethality than growth rate. *Nat Microbiol.* 2019 4(12):2109-2117.

632

633 **9. Kwan BW, Valenta JA, Benedik MJ, Wood TK.** Arrested protein synthesis increases persister-like cell  
634 formation. *Antimicrob Agents Chemother.* 2013 57(3):1468-73.

635

636 **10. Lobritz MA, Belenky P, Porter CB, Gutierrez A, Yang JH, Schwarz EG, Dwyer DJ, Khalil AS, Collins JJ.**  
637 Antibiotic efficacy is linked to bacterial cellular respiration. *Proc Natl Acad Sci U S A.* 2015  
638 112(27):8173-80.

639

640 **11. Conlon BP, Rowe SE, Gandt AB, Nuxoll AS, Donegan NP, Zalis EA, Clair G, Adkins JN, Cheung AL,**  
641 **Lewis K.** Persister formation in *Staphylococcus aureus* is associated with ATP depletion. *Nat*  
642 *Microbiol.* 2016 1:16051.

643

644 **12. Rowe SE, Beam JE, Conlon BP.** Recalcitrant *Staphylococcus aureus* Infections: Obstacles and  
645 Solutions. *Infect Immun.* 2021 89(4):e00694-20.

646

647 **13. Kuehl R, Morata L, Meylan S, Mensa J, Soriano A.** When antibiotics fail: a clinical and microbiological  
648 perspective on antibiotic tolerance and persistence of *Staphylococcus aureus*. *J Antimicrob*  
649 *Chemother.* 2020 75(5):1071-1086.

650

651 **14. Gimza BD, Cassat JE.** Mechanisms of Antibiotic Failure During *Staphylococcus aureus* Osteomyelitis.  
652 *Front Immunol.* 2021 12:638085.

653

654 **15. Rowe SE, Wagner NJ, Li L, Beam JE, Wilkinson AD, Radlinski LC, Zhang Q, Miao EA, Conlon BP.**  
655 Reactive oxygen species induce antibiotic tolerance during systemic *Staphylococcus aureus*  
656 infection. *Nat Microbiol.* 2020 5(2):282-290.

657

658 **16. Liu J, Gefen O, Ronin I, Bar-Meir M, Balaban NQ.** Effect of tolerance on the evolution of antibiotic  
659 resistance under drug combinations. *Science.* 2020 367(6474):200-204.

660

661 **17. Levin-Reisman I, Ronin I, Gefen O, Braniss I, Shores N, Balaban NQ.** Antibiotic tolerance facilitates  
662 the evolution of resistance. *Science.* 2017 355(6327):826-830.

663

664 **18. Holland TL, Arnold C, Fowler VG Jr.** Clinical management of *Staphylococcus aureus* bacteremia: a  
665 review. *JAMA.* 2014 312(13):1330-41.

666

667 **19. Ledger EVK, Sabnis A, Edwards AM.** Polymyxin and lipopeptide antibiotics: membrane-targeting  
668 drugs of last resort. *Microbiology.* 2022 168(2):001136.

669

670 **20. Mascio CT, Alder JD, Silverman JA.** Bactericidal action of daptomycin against stationary-phase and  
671 nondividing *Staphylococcus aureus* cells. *Antimicrob Agents Chemother.* 2007 51(12):4255-60.

672

673 **21. McCall IC, Shah N, Govindan A, Baquero F, Levin BR.** Antibiotic Killing of Diversely Generated  
674 Populations of Nonreplicating Bacteria. *Antimicrob Agents Chemother.* 2019 63(7):e02360-18.

675

- 676 **22. Alborn WE Jr, Allen NE, Preston DA.** Daptomycin disrupts membrane potential in growing  
677 *Staphylococcus aureus*. *Antimicrob Agents Chemother*. 1991 35(11):2282-7.  
678
- 679 **23. Muraih JK, Pearson A, Silverman J, Palmer M.** Oligomerization of daptomycin on membranes.  
680 *Biochim Biophys Acta*. 2011 1808(4):1154-60.  
681
- 682 **24. Grein F, Müller A, Scherer KM, Liu X, Ludwig KC, Klöckner A, Strach M, Sahl HG, Kubitscheck U,  
683 Schneider T.** Ca<sup>2+</sup>-Daptomycin targets cell wall biosynthesis by forming a tripartite complex with  
684 undecaprenyl-coupled intermediates and membrane lipids. *Nat Commun*. 2020 11(1):1455.  
685
- 686 **25. Allen NE, Hobbs JN, Alborn WE Jr.** Inhibition of peptidoglycan biosynthesis in gram-positive bacteria  
687 by LY146032. *Antimicrob Agents Chemother*. 1987 31(7):1093-9.  
688
- 689 **26. Müller A, Wenzel M, Strahl H, Grein F, Saaki TNV, Kohl B, Siersma T, Bandow JE, Sahl HG, Schneider  
690 T, Hamoen LW.** Daptomycin inhibits cell envelope synthesis by interfering with fluid membrane  
691 microdomains. *Proc Natl Acad Sci U S A*. 2016 113(45):E7077-E7086.  
692
- 693 **27. Lechner S, Lewis K, Bertram R.** *Staphylococcus aureus* persists tolerant to bactericidal antibiotics.  
694 *J Mol Microbiol Biotechnol*. 2012;22(4):235-44.  
695
- 696 **28. Johnston RD, Woodall BM, Harrison J, Campagna SR, Fozo EM.** Removal of peptidoglycan and  
697 inhibition of active cellular processes leads to daptomycin tolerance in *Enterococcus faecalis*. *PLoS  
698 One*. 2021 16(7):e0254796.  
699
- 700 **29. Boudjemaa R, Cabriel C, Dubois-Brissonnet F, Bourg N, Dupuis G, Gruss A, Lévêque-Fort S, Briandet  
701 R, Fontaine-Aupart MP, Steenkeste K.** Impact of Bacterial Membrane Fatty Acid Composition on the  
702 Failure of Daptomycin To Kill *Staphylococcus aureus*. *Antimicrob Agents Chemother*. 2018  
703 62(7):e00023-18.  
704
- 705 **30. Jorgensen SCJ, Zasowski EJ, Trinh TD, Lagnf AM, Bhatia S, Sabagha N, Abdul-Mutakabbir JC,  
706 Alosaimy S, Mynatt RP, Davis SL, Rybak MJ.** Daptomycin Plus  $\beta$ -Lactam Combination Therapy for  
707 Methicillin-resistant *Staphylococcus aureus* Bloodstream Infections: A Retrospective, Comparative  
708 Cohort Study. *Clin Infect Dis*. 2020 71(1):1-10.  
709
- 710 **31. Moise PA, Culshaw DL, Wong-Beringer A, Bensman J, Lamp KC, Smith WJ, Bauer K, Goff DA,  
711 Adamson R, Leuthner K, Virata MD, McKinnell JA, Chaudhry SB, Eskandarian R, Lodise T, Reyes K,  
712 Zervos MJ.** Comparative Effectiveness of Vancomycin Versus Daptomycin for MRSA Bacteremia  
713 With Vancomycin MIC >1 mg/L: A Multicenter Evaluation. *Clin Ther*. 2016 38(1):16-30.  
714
- 715 **32. Jobson S, Moise PA, Eskandarian R.** Retrospective observational study comparing vancomycin  
716 versus daptomycin as initial therapy for *Staphylococcus aureus* infections. *Clin Ther*. 2011  
717 33(10):1391-9.  
718
- 719 **33. Moore CL, Osaki-Kiyan P, Haque NZ, Perri MB, Donabedian S, Zervos MJ.** Daptomycin versus  
720 vancomycin for bloodstream infections due to methicillin-resistant *Staphylococcus aureus* with a  
721 high vancomycin minimum inhibitory concentration: a case-control study. *Clin Infect Dis*. 2012  
722 54(1):51-8. doi:  
723
- 724 **34. Ledger EVK, Mesnage S, Edwards AM.** Human serum triggers antibiotic tolerance in *Staphylococcus  
725 aureus*. *Nat Commun*. 2022 Apr 19;13(1):2041.  
726

- 727 **35. Peleg AY, Miyakis S, Ward DV, Earl AM, Rubio A, Cameron DR, Pillai S, Moellering RC Jr, Eliopoulos**  
728 **GM.** Whole genome characterization of the mechanisms of daptomycin resistance in clinical and  
729 laboratory derived isolates of *Staphylococcus aureus*. *PLoS One*. 2012;7(1):e28316.  
730
- 731 **36. Mishra NN, Bayer AS, Tran TT, Shamoo Y, Mileykovskaya E, Dowhan W, Guan Z, Arias CA.**  
732 Daptomycin resistance in enterococci is associated with distinct alterations of cell membrane  
733 phospholipid content. *PLoS One*. 2012;7(8):e43958.  
734
- 735 **37. Mishra NN, Bayer AS.** Correlation of cell membrane lipid profiles with daptomycin resistance in  
736 methicillin-resistant *Staphylococcus aureus*. *Antimicrob Agents Chemother*. 2013 57(2):1082-5.  
737
- 738 **38. Ledger EVK, Pader V, Edwards AM.** *Enterococcus faecalis* and pathogenic streptococci inactivate  
739 daptomycin by releasing phospholipids. *Microbiology*. 2017 163(10):1502-1508.  
740
- 741 **39. Pader V, Hakim S, Painter KL, Wigneshweraraj S, Clarke TB, Edwards AM.** *Staphylococcus aureus*  
742 inactivates daptomycin by releasing membrane phospholipids. *Nat Microbiol*. 2016 2:16194.  
743
- 744 **40. Mechler L, Bonetti EJ, Reichert S, Flötenmeyer M, Schrenzel J, Bertram R, François P, Götz F.**  
745 Daptomycin Tolerance in the *Staphylococcus aureus* pitA6 Mutant Is Due to Upregulation of the dlt  
746 Operon. *Antimicrob Agents Chemother*. 2016 60(5):2684-91.  
747
- 748 **41. Cui L, Tominaga E, Neoh HM, Hiramatsu K.** Correlation between Reduced Daptomycin Susceptibility  
749 and Vancomycin Resistance in Vancomycin-Intermediate *Staphylococcus aureus*. *Antimicrob Agents*  
750 *Chemother*. 2006 50(3):1079-82.  
751  
752
- 753 **42. Mishra NN, Liu GY, Yeaman MR, Nast CC, Proctor RA, McKinnell J, Bayer AS.** Carotenoid-related  
754 alteration of cell membrane fluidity impacts *Staphylococcus aureus* susceptibility to host defense  
755 peptides. *Antimicrob Agents Chemother*. 2011 55(2):526-31.  
756
- 757 **43. Rismondo J, Gillis A, Gründling A.** Modifications of cell wall polymers in Gram-positive bacteria by  
758 multi-component transmembrane glycosylation systems. *Curr Opin Microbiol*. 2021 60:24-33.  
759
- 760 **44. Kuru E, Hughes HV, Brown PJ, Hall E, Tekkam S, Cava F, de Pedro MA, Brun YV, VanNieuwenhze**  
761 **MS.** In Situ probing of newly synthesized peptidoglycan in live bacteria with fluorescent D-amino  
762 acids. *Angew Chem Int Ed Engl*. 2012 51(50):12519-23.  
763
- 764 **45. Pasquina L, Santa Maria JP Jr, McKay Wood B, Moussa SH, Matano LM, Santiago M, Martin SE, Lee**  
765 **W, Meredith TC, Walker S.** A synthetic lethal approach for compound and target identification in  
766 *Staphylococcus aureus*. *Nat Chem Biol*. 2016 12(1):40-5.  
767
- 768 **46. MANDELSTAM J, ROGERS HJ.** Chloramphenicol-resistant incorporation of amino-acids into  
769 Staphylococci and cell-wall synthesis. *Nature*. 1958 181(4614):956-7.  
770
- 771 **47. Mishra NN, Yang SJ, Sawa A, Rubio A, Nast CC, Yeaman MR, Bayer AS.** Analysis of cell membrane  
772 characteristics of *in vitro*-selected daptomycin-resistant strains of methicillin-resistant  
773 *Staphylococcus aureus*. *Antimicrob Agents Chemother*. 2009 53(6):2312-8.  
774
- 775 **48. Mishra NN, Bayer AS, Weidenmaier C, Grau T, Wanner S, Stefani S, Cafiso V, Bertuccio T, Yeaman**  
776 **MR, Nast CC, Yang SJ.** Phenotypic and genotypic characterization of daptomycin-resistant

- 777 methicillin-resistant *Staphylococcus aureus* strains: relative roles of *mprF* and *dlt* operons. *PLoS One*.  
778 2014 9(9):e107426.  
779
- 780 **49. Bertsche U, Weidenmaier C, Kuehner D, Yang SJ, Baur S, Wanner S, Francois P, Schrenzel J, Yeaman**  
781 **MR, Bayer AS.** Correlation of daptomycin resistance in a clinical *Staphylococcus aureus* strain with  
782 increased cell wall teichoic acid production and D-alanylation. *Antimicrob Agents Chemother*. 2011  
783 55(8):3922-8.  
784
- 785 **50. Bertsche U, Yang SJ, Kuehner D, Wanner S, Mishra NN, Roth T, Nega M, Schneider A, Mayer C,**  
786 **Grau T, Bayer AS, Weidenmaier C.** Increased cell wall teichoic acid production and D-alanylation are  
787 common phenotypes among daptomycin-resistant methicillin-resistant *Staphylococcus aureus*  
788 (MRSA) clinical isolates. *PLoS One*. 2013 8(6):e67398.  
789
- 790 **51. Yang SJ, Nast CC, Mishra NN, Yeaman MR, Fey PD, Bayer AS.** Cell wall thickening is not a universal  
791 accompaniment of the daptomycin nonsusceptibility phenotype in *Staphylococcus aureus*: evidence  
792 for multiple resistance mechanisms. *Antimicrob Agents Chemother*. 2010 54(8):3079-85.  
793
- 794 **52. Saleem N, Ryckaert F, Snow TAC, Satta G, Singer M, Arulkumaran N.** Mortality and clinical cure  
795 rates for pneumonia: a systematic review, meta-analysis, and trial sequential analysis of randomized  
796 control trials comparing bactericidal and bacteriostatic antibiotic treatments. *Clin Microbiol Infect*.  
797 2022 28(7):936-945.  
798
- 799 **53. Wald-Dickler N, Holtom P, Spellberg B.** Busting the Myth of "Static vs Cidal": A Systemic Literature  
800 Review. *Clin Infect Dis*. 2018 Apr 17;66(9):1470-1474.  
801
- 802 **54. Nemeth J, Oesch G, Kuster SP.** Bacteriostatic versus bactericidal antibiotics for patients with serious  
803 bacterial infections: systematic review and meta-analysis. *J Antimicrob Chemother*. 2015 70(2):382-  
804 95.  
805
- 806 **55. G.A. Pankey and L.D. Sabath.** Clinical relevance of bacteriostatic versus bactericidal mechanisms of  
807 action in the treatment of Gram-positive bacterial infections. *Clin. Infect. Dis*. 2004 38: 864-870  
808
- 809 **56. May J, Shannon K, King A, French G.** Glycopeptide tolerance in *Staphylococcus aureus*. *J Antimicrob*  
810 *Chemother*. 1998 42(2):189-97.  
811
- 812 **57. Safdar A, Rolston KV.** Vancomycin tolerance, a potential mechanism for refractory gram-positive  
813 bacteremia observational study in patients with cancer. *Cancer*. 2006 106(8):1815-20.  
814
- 815 **58. Britt NS, Patel N, Shireman TI, El Atrouni WI, Horvat RT, Steed ME.** Relationship between  
816 vancomycin tolerance and clinical outcomes in *Staphylococcus aureus* bacteraemia. *J Antimicrob*  
817 *Chemother*. 2017 72(2):535-542.  
818
- 819 **59. Miller CR, Monk JM, Szubin R, Berti AD.** Rapid resistance development to three antistaphylococcal  
820 therapies in antibiotic-tolerant *Staphylococcus aureus* bacteremia. *PLoS One*. 2021  
821 16(10):e0258592.  
822
- 823 **60. Mishra NN, Lew C, Abdelhady W, Lapitan CK, Proctor RA, Rose WE, Bayer AS.** Synergy Mechanisms  
824 of Daptomycin-Fosfomycin Combinations in Daptomycin-Susceptible and -Resistant Methicillin-  
825 Resistant *Staphylococcus aureus*: *In Vitro*, *Ex Vivo*, and *In Vivo* Metrics. *Antimicrob Agents*  
826 *Chemother*. 2022 66(1):e0164921.  
827

- 828 **61. Berti AD, Wergin JE, Girdaukas GG, Hetzel SJ, Sakoulas G, Rose WE.** Altering the proclivity towards  
829 daptomycin resistance in methicillin-resistant *Staphylococcus aureus* using combinations with other  
830 antibiotics. *Antimicrob Agents Chemother.* 2012 56(10):5046-53.  
831
- 832 **62. Rand KH, Houck HJ.** Synergy of daptomycin with oxacillin and other beta-lactams against methicillin-  
833 resistant *Staphylococcus aureus*. *Antimicrob Agents Chemother.* 2004 48(8):2871-5.  
834
- 835 **63. Pujol M, Miró JM, Shaw E, Aguado JM, San-Juan R, Puig-Asensio M, Pigrau C, Calbo E, Montejo M,**  
836 **Rodriguez-Álvarez R, Garcia-Pais MJ, Pintado V, Escudero-Sánchez R, Lopez-Contreras J, Morata L,**  
837 **Montero M, Andrés M, Pasquau J, Arenas MD, Padilla B, Murillas J, Jover-Sáenz A, López-Cortes**  
838 **LE, García-Pardo G, Gasch O, Videla S, Hereu P, Tebé C, Pallarès N, Sanlloriente M, Domínguez MÁ,**  
839 **Càmara J, Ferrer A, Padullés A, Cuervo G, Carratalà J; MRSA Bacteremia (BACSARM) Trial**  
840 **Investigators.** Daptomycin Plus Fosfomicin Versus Daptomycin Alone for Methicillin-resistant  
841 *Staphylococcus aureus* Bacteremia and Endocarditis: A Randomized Clinical Trial. *Clin Infect Dis.*  
842 2021 72(9):1517-1525.  
843
- 844 **64. Kale-Pradhan PB, Giuliano C, Jongekrijg A, Rybak MJ.** Combination of Vancomycin or Daptomycin  
845 and Beta-lactam Antibiotics: A Meta-analysis. *Pharmacotherapy.* 2020 40(7):648-658.  
846
- 847 **65. Jorgensen SCJ, Zasowski EJ, Trinh TD, Lagnf AM, Bhatia S, Sabagha N, Abdul-Mutakabbir JC,**  
848 **Alosaimy S, Mynatt RP, Davis SL, Rybak MJ.** Daptomycin Plus  $\beta$ -Lactam Combination Therapy for  
849 Methicillin-resistant *Staphylococcus aureus* Bloodstream Infections: A Retrospective, Comparative  
850 Cohort Study. *Clin Infect Dis.* 2020 71(1):1-10.  
851
- 852 **66. Tong SYC, Davis JS.** Combination Therapy for *Staphylococcus aureus* Bacteremia: Hopes Dashed  
853 Again. *Clin Infect Dis.* 2021 72(9):e204-e205.  
854
- 855 **67. Boles BR, Thoendel M, Roth AJ, Horswill AR.** Identification of genes involved in polysaccharide-  
856 independent *Staphylococcus aureus* biofilm formation. *PLoS One.* 2010 5(4):e10146.  
857
- 858 **68. Schuster CF, Wiedemann DM, Kirsebom FCM, Santiago M, Walker S, Gründling A.** High-throughput  
859 transposon sequencing highlights the cell wall as an important barrier for osmotic stress in  
860 methicillin resistant *Staphylococcus aureus* and underlines a tailored response to different osmotic  
861 stressors. *Mol Microbiol.* 2020 113(4):699-717.  
862
- 863 **69. Karinou E, Schuster CF, Pazos M, Vollmer W, Gründling A.** Inactivation of the Monofunctional  
864 Peptidoglycan Glycosyltransferase SgtB Allows *Staphylococcus aureus* To Survive in the Absence of  
865 Lipoteichoic Acid. *J Bacteriol.* 2018 201(1):e00574-18.  
866
- 867 **70. Fey PD, Endres JL, Yajjala VK, Widhelm TJ, Boissy RJ, Bose JL, Bayles KW.** A genetic resource for  
868 rapid and comprehensive phenotype screening of nonessential *Staphylococcus aureus* genes. *mBio.*  
869 2013 4(1):e00537-12.

870

871
